# Supplementary material for: Targeted MicroRNA Profiling Reveals That Exendin-4 Modulates the Expression of Several MicroRNAs to Reduce Steatosis in HepG2 Cells
Source: MDPI journal article supplement (doi:10.3390/ijms241411606), 2023-07-18
Supplement: s1 [file s1]

## *Supplementary Materials*

### *Targeted microRNA profiling reveals that Exendin-4 modulates the expression of several microRNAs to reduce steatosis in HepG2 cells*

**Olfa Khalifa<sup>1</sup>, Khalid Ouararhni<sup>2</sup>, Khaoula Erraffi<sup>3</sup>, Nehad M. Alajez<sup>4,5</sup>, Abdelilah Arredouani<sup>1,5</sup>**

<sup>1</sup>Diabetes Research Center, Qatar Biomedical Research Institute, Hamad Bin Khalifa University, Qatar Foundation, Doha, Qatar.

<sup>2</sup>Genomic core, Qatar Biomedical Research Institute, Hamad Bin Khalifa University, Qatar Foundation, Doha, Qatar.

<sup>3</sup>African Genome Center, Mohammed VI Polytechnic University (UM6P), Ben Guerir 43151, Morocco.

<sup>4</sup>Translational Cancer and Immunity Center Qatar Biomedical Research Institute, Hamad Bin Khalifa University, Qatar Foundation, Doha, Qatar.

<sup>5</sup>College of Health & Life Sciences, Hamad Bin Khalifa University Qatar Foundation, Doha, Qatar

\*Corresponding author: [aarredouani@hbku.edu.qa](mailto:aarredouani@hbku.edu.qa)

Qatar Biomedical Research Institute

Hamad Bin Khalifa University

PO Box: 34110

Tel: +974 445 42947

Fax: +974 445 41770

Doha, Qatar

(A)

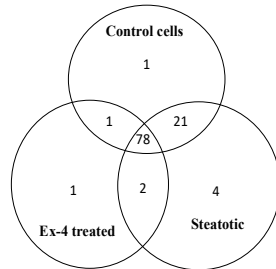

(B)

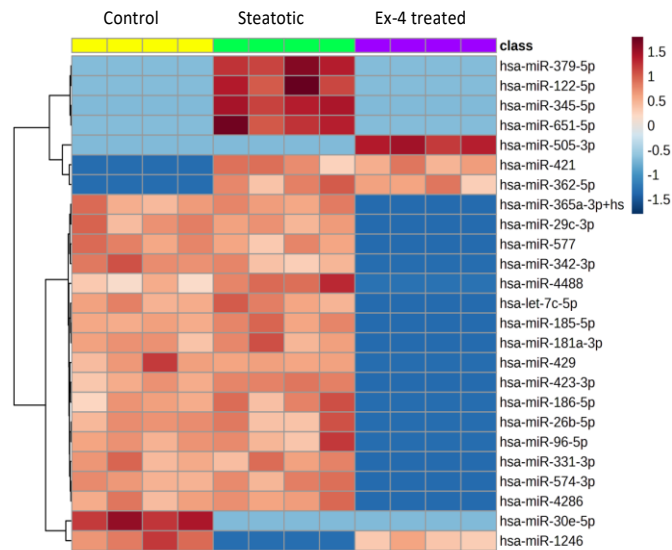

**Supplementary Data S1.** Heatmap and Venn diagram depicting microRNA expression. A. Venn diagram of the overlap of miRNA profiles in control, steatotic, and Ex-4-treated cells. The miRNAs differentially expressed in three are depicted in three overlapping circles. B. Heat map of the top 30 differentially expressed microRNAs between control, steatotic, and Ex-4-treated cells (n=4 for each condition). The miRNA species are shown on the right. Cluster analysis classified the samples into groups based on miRNA expression levels in each sample. The dendrogram shows significantly different expression levels of miRNAs among samples. Red indicates high miRNA expression, and blue indicates relatively low miRNA expression.

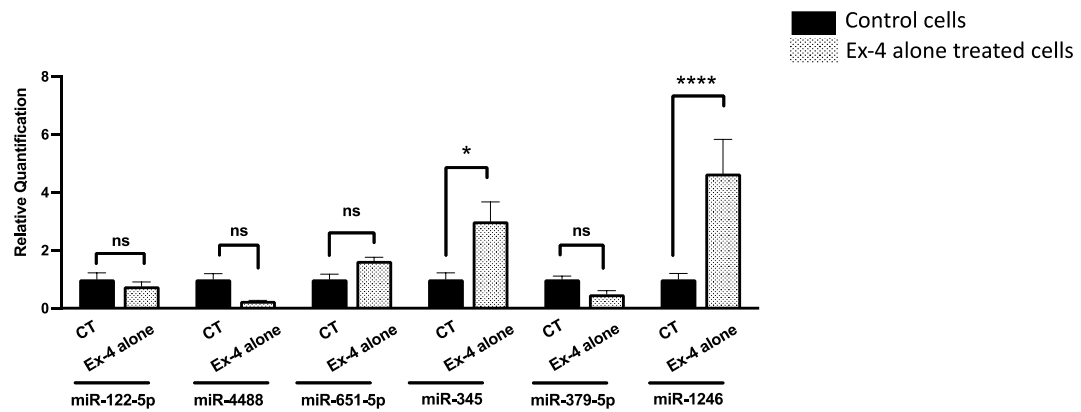

**Supplementary data2:** Ex-4 treatment downregulates the expression of miR-122-5p, miR-4488, and miR-379-5p and upregulates the expression of miR-651-5p, miR-345-5p, and miR-1246. mRNA expression levels of miR-122-5p, miR-4488, and miR-651-5p, miR-345, miR-379-5p and miR-1246. All values are expressed as the mean  $\pm$  SE (n = 3). Ns: not significant, \* p < 0.05, \*\* p < 0.01, \*\*\* p < 0.001. The experiment was performed in triplicate.

| Table S1. List of miRNAs in CT, OA and Ex-4 group after normalization |                                 |                               |
|-----------------------------------------------------------------------|---------------------------------|-------------------------------|
| CT                                                                    | OA                              | Ex-4                          |
| hsa-miR-769-5p                                                        | hsa-miR-122-5p                  | hsa-miR-769-5p                |
| hsa-miR-197-3p                                                        | hsa-miR-345-5p                  | hsa-miR-30d-5p                |
| hsa-miR-577                                                           | hsa-miR-769-5p                  | hsa-miR-505-3p                |
| hsa-miR-145-5p                                                        | hsa-miR-197-3p                  | hsa-miR-302d-3p               |
| hsa-miR-186-5p                                                        | hsa-miR-577                     | hsa-miR-362-5p                |
| hsa-miR-30d-5p                                                        | hsa-miR-145-5p                  | hsa-miR-1246                  |
| hsa-miR-4488                                                          | hsa-miR-186-5p                  | hsa-miR-30e-3p                |
| hsa-miR-429                                                           | hsa-miR-30d-5p                  | hsa-miR-95-3p                 |
| hsa-miR-302d-3p                                                       | hsa-miR-4488                    | hsa-miR-149-5p                |
| hsa-miR-140-5p                                                        | hsa-miR-429                     | hsa-miR-574-5p                |
| hsa-miR-10a-5p                                                        | hsa-miR-651-5p                  | hsa-miR-4532                  |
| hsa-miR-365a-3p+hsa-miR-365b-3p                                       | hsa-miR-302d-3p                 | hsa-miR-374b-5p               |
| hsa-miR-342-3p                                                        | hsa-miR-140-5p                  | hsa-miR-421                   |
| hsa-miR-29c-3p                                                        | hsa-miR-10a-5p                  | hsa-miR-590-5p                |
| hsa-miR-1246                                                          | hsa-miR-365a-3p+hsa-miR-365b-3p | hsa-miR-30b-5p                |
| hsa-miR-30e-3p                                                        | hsa-miR-342-3p                  | hsa-miR-92a-3p                |
| hsa-miR-423-3p                                                        | hsa-miR-29c-3p                  | hsa-miR-34a-5p                |
| hsa-miR-95-3p                                                         | hsa-miR-362-5p                  | hsa-miR-26a-5p                |
| hsa-miR-149-5p                                                        | hsa-miR-30e-3p                  | hsa-miR-642a-5p               |
| hsa-miR-574-3p                                                        | hsa-miR-423-3p                  | hsa-miR-132-3p                |
| hsa-miR-30e-5p                                                        | hsa-miR-95-3p                   | hsa-miR-183-5p                |
| hsa-miR-574-5p                                                        | hsa-miR-379-5p                  | hsa-miR-324-5p                |
| hsa-miR-4532                                                          | hsa-miR-149-5p                  | hsa-miR-340-5p                |
| hsa-let-7c-5p                                                         | hsa-miR-574-3p                  | hsa-let-7f-5p                 |
| hsa-miR-374b-5p                                                       | hsa-miR-574-5p                  | hsa-miR-142-3p                |
| hsa-miR-1260a                                                         | hsa-miR-4532                    | hsa-miR-361-5p                |
| hsa-miR-590-5p                                                        | hsa-let-7c-5p                   | hsa-miR-20a-5p+hsa-miR-20b-5p |
| hsa-miR-96-5p                                                         | hsa-miR-374b-5p                 | hsa-miR-31-5p                 |
| hsa-miR-4286                                                          | hsa-miR-1260a                   | hsa-miR-423-5p                |
| hsa-miR-30b-5p                                                        | hsa-miR-421                     | hsa-miR-196a-5p               |
| hsa-miR-92a-3p                                                        | hsa-miR-590-5p                  | hsa-miR-196b-5p               |
| hsa-miR-34a-5p                                                        | hsa-miR-96-5p                   | hsa-miR-126-3p                |
| hsa-miR-181a-3p                                                       | hsa-miR-4286                    | hsa-miR-301a-3p               |
| hsa-miR-185-5p                                                        | hsa-miR-30b-5p                  | hsa-miR-151a-3p               |
| hsa-miR-26a-5p                                                        | hsa-miR-92a-3p                  | hsa-miR-16-5p                 |
| hsa-miR-642a-5p                                                       | hsa-miR-34a-5p                  | hsa-miR-148b-3p               |
| hsa-miR-132-3p                                                        | hsa-miR-181a-3p                 | hsa-miR-148a-3p               |
| hsa-miR-183-5p                                                        | hsa-miR-185-5p                  | hsa-miR-18a-5p                |
| hsa-miR-324-5p                                                        | hsa-miR-26a-5p                  | hsa-miR-28-5p                 |
| hsa-miR-331-3p                                                        | hsa-miR-642a-5p                 | hsa-miR-24-3p                 |
| hsa-miR-340-5p                                                        | hsa-miR-132-3p                  | hsa-miR-19b-3p                |
| hsa-let-7f-5p                                                         | hsa-miR-183-5p                  | hsa-miR-107                   |

|                               |                               |                               |
|-------------------------------|-------------------------------|-------------------------------|
| hsa-miR-142-3p                | hsa-miR-324-5p                | hsa-miR-200a-3p               |
| hsa-miR-361-5p                | hsa-miR-331-3p                | hsa-miR-106b-5p               |
| hsa-miR-20a-5p+hsa-miR-20b-5p | hsa-miR-340-5p                | hsa-miR-141-3p                |
| hsa-miR-31-5p                 | hsa-let-7f-5p                 | hsa-miR-222-3p                |
| hsa-miR-26b-5p                | hsa-miR-142-3p                | hsa-let-7e-5p                 |
| hsa-miR-423-5p                | hsa-miR-361-5p                | hsa-miR-98-5p                 |
| hsa-miR-196a-5p               | hsa-miR-20a-5p+hsa-miR-20b-5p | hsa-miR-1180-3p               |
| hsa-miR-196b-5p               | hsa-miR-31-5p                 | hsa-miR-130a-3p               |
| hsa-miR-126-3p                | hsa-miR-26b-5p                | hsa-miR-99b-5p                |
| hsa-miR-301a-3p               | hsa-miR-423-5p                | hsa-miR-181a-5p               |
| hsa-miR-151a-3p               | hsa-miR-196a-5p               | hsa-miR-23b-3p                |
| hsa-miR-16-5p                 | hsa-miR-196b-5p               | hsa-miR-27b-3p                |
| hsa-miR-148b-3p               | hsa-miR-126-3p                | hsa-miR-19a-3p                |
| hsa-miR-148a-3p               | hsa-miR-301a-3p               | hsa-miR-15a-5p                |
| hsa-miR-18a-5p                | hsa-miR-151a-3p               | hsa-miR-221-3p                |
| hsa-miR-28-5p                 | hsa-miR-16-5p                 | hsa-let-7i-5p                 |
| hsa-miR-24-3p                 | hsa-miR-148b-3p               | hsa-miR-29a-3p                |
| hsa-miR-19b-3p                | hsa-miR-148a-3p               | hsa-miR-9-5p                  |
| hsa-miR-107                   | hsa-miR-18a-5p                | hsa-miR-125a-5p               |
| hsa-miR-200a-3p               | hsa-miR-28-5p                 | hsa-miR-106a-5p+hsa-miR-17-5p |
| hsa-miR-106b-5p               | hsa-miR-24-3p                 | hsa-miR-32-5p                 |
| hsa-miR-141-3p                | hsa-miR-19b-3p                | hsa-let-7g-5p                 |
| hsa-miR-222-3p                | hsa-miR-107                   | hsa-miR-200b-3p               |
| hsa-let-7e-5p                 | hsa-miR-200a-3p               | hsa-miR-7-5p                  |
| hsa-miR-98-5p                 | hsa-miR-106b-5p               | hsa-miR-135b-5p               |
| hsa-miR-1180-3p               | hsa-miR-141-3p                | hsa-let-7d-5p                 |
| hsa-miR-130a-3p               | hsa-miR-222-3p                | hsa-miR-15b-5p                |
| hsa-miR-99b-5p                | hsa-let-7e-5p                 | hsa-miR-25-3p                 |
| hsa-miR-181a-5p               | hsa-miR-98-5p                 | hsa-miR-374a-5p               |
| hsa-miR-23b-3p                | hsa-miR-1180-3p               | hsa-miR-125b-5p               |
| hsa-miR-27b-3p                | hsa-miR-130a-3p               | hsa-miR-200c-3p               |
| hsa-miR-19a-3p                | hsa-miR-99b-5p                | hsa-miR-23a-3p                |
| hsa-miR-15a-5p                | hsa-miR-181a-5p               | hsa-let-7b-5p                 |
| hsa-miR-221-3p                | hsa-miR-23b-3p                | hsa-miR-93-5p                 |
| hsa-let-7i-5p                 | hsa-miR-27b-3p                | hsa-miR-191-5p                |
| hsa-miR-29a-3p                | hsa-miR-19a-3p                | hsa-miR-21-5p                 |
| hsa-miR-9-5p                  | hsa-miR-15a-5p                | hsa-miR-100-5p                |
| hsa-miR-125a-5p               | hsa-miR-221-3p                | hsa-miR-4454+hsa-miR-7975     |
| hsa-miR-106a-5p+hsa-miR-17-5p | hsa-let-7i-5p                 | hsa-let-7a-5p                 |
| hsa-miR-32-5p                 | hsa-miR-29a-3p                | hsa-miR-29b-3p                |
| hsa-let-7g-5p                 | hsa-miR-9-5p                  |                               |
| hsa-miR-200b-3p               | hsa-miR-125a-5p               |                               |
| hsa-miR-7-5p                  | hsa-miR-106a-5p+hsa-miR-17-5p |                               |
| hsa-miR-135b-5p               | hsa-miR-32-5p                 |                               |

|                           |                           |  |
|---------------------------|---------------------------|--|
| hsa-let-7d-5p             | hsa-let-7g-5p             |  |
| hsa-miR-15b-5p            | hsa-miR-200b-3p           |  |
| hsa-miR-25-3p             | hsa-miR-7-5p              |  |
| hsa-miR-374a-5p           | hsa-miR-135b-5p           |  |
| hsa-miR-125b-5p           | hsa-let-7d-5p             |  |
| hsa-miR-200c-3p           | hsa-miR-15b-5p            |  |
| hsa-miR-23a-3p            | hsa-miR-25-3p             |  |
| hsa-let-7b-5p             | hsa-miR-374a-5p           |  |
| hsa-miR-93-5p             | hsa-miR-125b-5p           |  |
| hsa-miR-191-5p            | hsa-miR-200c-3p           |  |
| hsa-miR-21-5p             | hsa-miR-23a-3p            |  |
| hsa-miR-100-5p            | hsa-let-7b-5p             |  |
| hsa-miR-4454+hsa-miR-7975 | hsa-miR-93-5p             |  |
| hsa-let-7a-5p             | hsa-miR-191-5p            |  |
| hsa-miR-29b-3p            | hsa-miR-21-5p             |  |
|                           | hsa-miR-100-5p            |  |
|                           | hsa-miR-4454+hsa-miR-7975 |  |
|                           | hsa-let-7a-5p             |  |
|                           | hsa-miR-29b-3p            |  |

Table S2. miRNAs with VIP score > 1 from PLS-DA analysis of OA versus control samples.

| miRNAs          | Comp. 1 | Comp. 2 | Comp. 3 | Comp. 4 |
|-----------------|---------|---------|---------|---------|
| hsa-miR-345-5p  | 1.8584  | 1.7905  | 1.7882  | 1.788   |
| hsa-miR-30e-5p  | 1.8555  | 1.7915  | 1.7891  | 1.789   |
| hsa-miR-1246    | 1.8509  | 1.7839  | 1.7816  | 1.7814  |
| hsa-miR-379-5p  | 1.8492  | 1.7835  | 1.7811  | 1.781   |
| hsa-miR-362-5p  | 1.8409  | 1.7711  | 1.7687  | 1.7686  |
| hsa-miR-651-5p  | 1.8351  | 1.7677  | 1.7654  | 1.7653  |
| hsa-miR-421     | 1.8349  | 1.7792  | 1.7769  | 1.7768  |
| hsa-miR-122-5p  | 1.8249  | 1.7629  | 1.7606  | 1.7604  |
| hsa-miR-4532    | 1.7495  | 1.6814  | 1.6791  | 1.679   |
| hsa-let-7a-5p   | 1.663   | 1.5993  | 1.5971  | 1.597   |
| hsa-miR-4488    | 1.6577  | 1.5932  | 1.5914  | 1.5913  |
| hsa-miR-191-5p  | 1.6038  | 1.5448  | 1.5428  | 1.5427  |
| hsa-let-7b-5p   | 1.5708  | 1.5164  | 1.5144  | 1.5143  |
| hsa-miR-29b-3p  | 1.5582  | 1.5025  | 1.5006  | 1.5005  |
| hsa-miR-423-3p  | 1.5429  | 1.4954  | 1.4947  | 1.4946  |
| hsa-miR-200a-3p | 1.5357  | 1.4774  | 1.4756  | 1.4755  |
| hsa-miR-374a-5p | 1.53    | 1.4708  | 1.4703  | 1.4702  |
| hsa-miR-423-5p  | 1.4925  | 1.4385  | 1.4366  | 1.4365  |
| hsa-let-7e-5p   | 1.4786  | 1.421   | 1.4193  | 1.4192  |
| hsa-miR-302d-3p | 1.4609  | 1.4061  | 1.4055  | 1.4054  |
| hsa-miR-342-3p  | 1.388   | 1.3624  | 1.3613  | 1.3612  |
| hsa-miR-98-5p   | 1.383   | 1.3302  | 1.3285  | 1.3284  |
| hsa-miR-185-5p  | 1.3716  | 1.3299  | 1.3295  | 1.3294  |
| hsa-miR-23a-3p  | 1.3199  | 1.279   | 1.2777  | 1.2777  |
| hsa-miR-7-5p    | 1.3187  | 1.2736  | 1.2719  | 1.2719  |
| hsa-miR-95-3p   | 1.2725  | 1.2324  | 1.2307  | 1.2307  |
| hsa-miR-148a-3p | 1.1975  | 1.1699  | 1.1686  | 1.1685  |
| hsa-miR-135b-5p | 1.1948  | 1.1529  | 1.1538  | 1.1538  |

|                |        |         |         |         |
|----------------|--------|---------|---------|---------|
| hsa-miR-24-3p  | 1.1945 | 1.1579  | 1.1564  | 1.1563  |
| hsa-miR-21-5p  | 1.183  | 1.1676  | 1.166   | 1.166   |
| hsa-miR-149-5p | 1.1341 | 1.1025  | 1.1025  | 1.1026  |
| hsa-miR-25-3p  | 1.1108 | 1.0903  | 1.0889  | 1.0888  |
| hsa-let-7g-5p  | 1.1037 | 1.0845  | 1.0853  | 1.0852  |
| hsa-miR-126-3p | 1.0964 | 1.0605  | 1.0596  | 1.0596  |
| hsa-miR-577    | 1.0637 | 1.0472  | 1.0459  | 1.0458  |
| hsa-miR-221-3p | 1.0496 | 1.1099  | 1.1091  | 1.109   |
| hsa-miR-26a-5p | 1.0425 | 1.0173  | 1.0163  | 1.0162  |
| hsa-miR-100-5p | 1.0229 | 1.0402  | 1.0391  | 1.039   |
| hsa-miR-30e-3p | 1.0198 | 0.9801  | 0.98017 | 0.98037 |
| hsa-miR-31-5p  | 1.0159 | 0.97639 | 0.97857 | 0.97861 |
| hsa-miR-186-5p | 1.0117 | 0.99637 | 0.99717 | 0.9971  |
| hsa-miR-30b-5p | 1.0114 | 0.98978 | 0.99066 | 0.99065 |



Table S3. miRNAs with VIP score > 1 from PLS-DA analysis of Ex-4 versus OA samples.

| miRNAs                          | Comp. 1 | Comp. 2 | Comp. 3 | Comp. 4 |
|---------------------------------|---------|---------|---------|---------|
| hsa-miR-429                     | 1.2876  | 1.2637  | 1.2616  | 1.2614  |
| hsa-miR-423-3p                  | 1.2874  | 1.2644  | 1.2623  | 1.2621  |
| hsa-miR-29c-3p                  | 1.2851  | 1.2586  | 1.2565  | 1.2564  |
| hsa-miR-505-3p                  | 1.2845  | 1.2689  | 1.2668  | 1.2667  |
| hsa-miR-365a-3p+hsa-miR-365b-3p | 1.2841  | 1.2513  | 1.2491  | 1.2489  |
| hsa-miR-345-5p                  | 1.2833  | 1.2525  | 1.2502  | 1.2501  |
| hsa-miR-185-5p                  | 1.2827  | 1.2586  | 1.2566  | 1.2565  |
| hsa-miR-4286                    | 1.2824  | 1.2473  | 1.2451  | 1.245   |
| hsa-miR-1246                    | 1.2816  | 1.2673  | 1.265   | 1.2649  |
| hsa-miR-574-3p                  | 1.2799  | 1.2467  | 1.2444  | 1.2443  |
| hsa-miR-577                     | 1.2787  | 1.2536  | 1.2513  | 1.2512  |
| hsa-miR-4488                    | 1.2783  | 1.2436  | 1.2417  | 1.2415  |
| hsa-miR-379-5p                  | 1.277   | 1.2548  | 1.2526  | 1.2525  |
| hsa-miR-331-3p                  | 1.2764  | 1.2538  | 1.2523  | 1.2522  |
| hsa-miR-342-3p                  | 1.275   | 1.2443  | 1.242   | 1.2419  |
| hsa-let-7c-5p                   | 1.2745  | 1.2579  | 1.2556  | 1.2555  |
| hsa-miR-181a-3p                 | 1.2728  | 1.2555  | 1.2537  | 1.2535  |
| hsa-miR-197-3p                  | 1.2715  | 1.2595  | 1.2582  | 1.2581  |
| hsa-miR-186-5p                  | 1.27    | 1.2303  | 1.228   | 1.2279  |
| hsa-miR-651-5p                  | 1.2672  | 1.2333  | 1.2312  | 1.2311  |
| hsa-miR-1260a                   | 1.2611  | 1.2421  | 1.24    | 1.2399  |
| hsa-miR-122-5p                  | 1.2602  | 1.248   | 1.2457  | 1.2456  |
| hsa-miR-10a-5p                  | 1.2593  | 1.2457  | 1.2441  | 1.2441  |
| hsa-miR-26b-5p                  | 1.2593  | 1.2146  | 1.2123  | 1.2122  |
| hsa-miR-96-5p                   | 1.2551  | 1.2092  | 1.207   | 1.2069  |
| hsa-miR-140-5p                  | 1.2539  | 1.2462  | 1.2456  | 1.2454  |
| hsa-miR-145-5p                  | 1.2482  | 1.2146  | 1.2129  | 1.2129  |
| hsa-miR-423-5p                  | 1.2466  | 1.2528  | 1.2505  | 1.2503  |

|                               |        |        |         |         |
|-------------------------------|--------|--------|---------|---------|
| hsa-let-7i-5p                 | 1.2297 | 1.1801 | 1.1782  | 1.1781  |
| hsa-miR-4454+hsa-miR-7975     | 1.2043 | 1.1557 | 1.1543  | 1.1542  |
| hsa-let-7g-5p                 | 1.1791 | 1.132  | 1.1311  | 1.131   |
| hsa-let-7a-5p                 | 1.1718 | 1.1265 | 1.1247  | 1.1246  |
| hsa-miR-1180-3p               | 1.1603 | 1.1134 | 1.1123  | 1.1122  |
| hsa-miR-30b-5p                | 1.156  | 1.1104 | 1.1105  | 1.1104  |
| hsa-let-7e-5p                 | 1.147  | 1.1014 | 1.0995  | 1.0994  |
| hsa-miR-21-5p                 | 1.1456 | 1.1077 | 1.1058  | 1.1057  |
| hsa-miR-4532                  | 1.1401 | 1.0975 | 1.0963  | 1.0963  |
| hsa-let-7b-5p                 | 1.1355 | 1.1016 | 1.0999  | 1.0998  |
| hsa-miR-340-5p                | 1.1348 | 1.1044 | 1.1026  | 1.1025  |
| hsa-miR-181a-5p               | 1.107  | 1.063  | 1.061   | 1.0609  |
| hsa-miR-106b-5p               | 1.1012 | 1.0569 | 1.0549  | 1.0549  |
| hsa-miR-29b-3p                | 1.0991 | 1.0669 | 1.0653  | 1.0652  |
| hsa-miR-200c-3p               | 1.0901 | 1.0494 | 1.048   | 1.0483  |
| hsa-miR-200a-3p               | 1.0781 | 1.0439 | 1.0428  | 1.0427  |
| hsa-miR-24-3p                 | 1.0726 | 1.0338 | 1.0336  | 1.0339  |
| hsa-miR-7-5p                  | 1.0664 | 1.0233 | 1.0216  | 1.0216  |
| hsa-miR-141-3p                | 1.0624 | 1.0422 | 1.0408  | 1.0407  |
| hsa-miR-26a-5p                | 1.0617 | 1.0242 | 1.0223  | 1.0224  |
| hsa-let-7f-5p                 | 1.055  | 1.0197 | 1.0197  | 1.0196  |
| hsa-miR-106a-5p+hsa-miR-17-5p | 1.0435 | 1.02   | 1.0181  | 1.018   |
| hsa-miR-25-3p                 | 1.0414 | 1.017  | 1.0152  | 1.015   |
| hsa-miR-99b-5p                | 1.0409 | 1.0195 | 1.0196  | 1.0195  |
| hsa-miR-191-5p                | 1.0273 | 1.0063 | 1.0068  | 1.0067  |
| hsa-miR-30e-3p                | 1.0222 | 1.0114 | 1.0127  | 1.0127  |
| hsa-miR-29a-3p                | 1.0116 | 1.0095 | 1.0085  | 1.0085  |
| hsa-miR-374a-5p               | 1.0055 | 0.9709 | 0.96912 | 0.96909 |
| hsa-let-7d-5p                 | 1.0045 | 1.0019 | 1.0003  | 1.0002  |

Table S4. NanoString Data.

| sample          | C1          | C2          | C3          | C4          | OA1         | OA2         | OA3         | OA4         | EX1         | EX2         | EX3         | EX4         |
|-----------------|-------------|-------------|-------------|-------------|-------------|-------------|-------------|-------------|-------------|-------------|-------------|-------------|
| label           | 1           | 1           | 1           | 1           | 2           | 2           | 2           | 2           | 3           | 3           | 3           | 3           |
| hsa-miR-122-5p  |             |             |             |             | 4.576651092 | 3.262642741 | 6.82716493  | 3.640145606 |             |             |             |             |
| hsa-miR-345-5p  |             |             |             |             | 4.250797024 | 3.262642741 | 3.95256917  | 4.160166407 |             |             |             |             |
| hsa-miR-769-5p  | 5.847953216 | 4.14507772  | 3.266194883 | 4.41974194  | 4.126268918 | 3.188097768 | 5.03054258  | 4.160166407 | 4.076513013 | 4.08496732  | 5.353319058 | 4.504933131 |
| hsa-miR-197-3p  | 4.948268106 | 3.799654577 | 8.169934641 | 5.639285775 | 4.250797024 | 8.156606852 | 6.10851599  | 5.720228809 |             |             |             |             |
| hsa-miR-577     | 5.847953216 | 5.18134715  | 4.08496732  | 5.038089229 | 4.151117242 | 3.262642741 | 5.03054258  | 4.160166407 |             |             |             |             |
| hsa-miR-145-5p  | 4.498425551 | 4.490500864 | 4.08496732  | 6.532389766 | 6.866175182 | 9.564293305 | 3.23392023  | 7.800312012 |             |             |             |             |
| hsa-miR-186-5p  | 3.598740441 | 5.872193437 | 5.443658138 | 4.971530672 | 7.438894793 | 4.350190321 | 6.46784046  | 8.840353614 |             |             |             |             |
| hsa-miR-30d-5p  | 3.598740441 | 6.21761658  | 11.9760479  | 7.264134975 | 7.970244421 | 4.893964111 | 7.54581387  | 10.92043682 | 5.017246786 | 3.267973856 | 5.353319058 | 4.5461799   |
| hsa-miR-505-3p  |             |             |             |             |             |             |             |             | 3.762935089 | 4.08496732  | 3.211991435 | 3.686631281 |
| hsa-miR-4488    | 5.847953216 | 4.835924007 | 7.352941176 | 4.899292324 | 9.564293305 | 11.41924959 | 11.13905857 | 17.16068643 |             |             |             |             |
| hsa-miR-429     | 3.598740441 | 4.490500864 | 7.352941176 | 4.354926511 | 4.250797024 | 4.350190321 | 4.160166407 | 4.253717917 |             |             |             |             |
| hsa-miR-651-5p  |             |             |             |             | 7.438894793 | 3.806416531 | 4.67121811  | 5.200208008 |             |             |             |             |
| hsa-miR-302d-3p | 4.048582996 | 5.872193437 | 4.899292324 | 4.940022919 | 7.221069685 | 5.437737901 | 7.90513834  | 8.320332813 | 4.703668862 | 6.535947712 | 6.423982869 | 5.887866481 |
| hsa-miR-140-5p  | 3.148897886 | 3.799654577 | 3.267973856 | 3.405508773 | 3.188097768 | 7.612833061 | 3.95256917  | 4.160166407 |             |             |             |             |
| hsa-miR-10a-5p  | 4.048582996 | 4.14507772  | 6.535947712 | 5.988023952 | 3.719447396 | 5.981511691 | 8.98311175  | 6.24024961  |             |             |             |             |

|                                 |             |             |             |             |             |             |             |             |             |             |             |             |
|---------------------------------|-------------|-------------|-------------|-------------|-------------|-------------|-------------|-------------|-------------|-------------|-------------|-------------|
| hsa-miR-365a-3p+hsa-miR-365b-3p | 8.547008547 | 5.872193437 | 5.443658138 | 6.620953374 | 7.438894793 | 6.525285481 | 6.10851599  | 7.800312012 |             |             |             |             |
| hsa-miR-342-3p                  | 6.887494493 | 8.547008547 | 6.12745098  | 5.988023952 | 6.376195537 | 4.350190321 | 3.95256917  | 4.680187207 |             |             |             |             |
| hsa-miR-29c-3p                  | 6.297795771 | 3.799654577 | 4.901960784 | 5.443658138 | 4.508906829 | 4.893964111 | 3.95256917  | 4.680187207 |             |             |             |             |
| hsa-miR-362-5p                  |             |             |             |             | 4.84447831  | 3.262642741 | 5.03054258  | 6.24024961  | 4.157509995 | 4.08496732  | 5.353319058 | 3.034243606 |
| hsa-miR-1246                    | 4.498425551 | 5.18134715  | 7.621121394 | 5.766964698 |             |             |             |             | 3.135779241 | 4.08496732  | 3.211991435 | 3.034243606 |
| hsa-miR-30e-3p                  | 3.148897886 | 4.835924007 | 3.266194883 | 3.750338925 | 4.782146652 | 3.806416531 | 5.74919152  | 4.160166407 | 3.762935089 | 3.267973856 | 3.211991435 | 3.034243606 |
| hsa-miR-423-3p                  | 3.148897886 | 3.799654577 | 4.493464052 | 3.814005505 | 4.782146652 | 4.893964111 | 5.200208008 | 4.958772924 |             |             |             |             |
| hsa-miR-95-3p                   | 5.398110661 | 6.21761658  | 5.310457516 | 6.532389766 | 7.438894793 | 5.981511691 | 6.82716493  | 7.800312012 | 5.33082471  | 5.718954248 | 3.034243606 | 4.694674188 |
| hsa-miR-379-5p                  |             |             |             |             | 4.782146652 | 4.350190321 | 6.760270411 | 5.297535795 |             |             |             |             |
| hsa-miR-149-5p                  | 5.847953216 | 7.944732297 | 5.310457516 | 8.165487207 | 5.056549415 | 6.376195537 | 3.5932447   | 5.200208008 | 3.762935089 | 4.901960784 | 8.565310493 | 3.467706979 |
| hsa-miR-574-3p                  | 4.048582996 | 3.799654577 | 3.267973856 | 3.266194883 | 4.060059539 | 3.188097768 | 4.31189364  | 4.680187207 |             |             |             |             |
| hsa-miR-30e-5p                  | 3.598740441 | 4.835924007 | 3.676470588 | 4.354926511 |             |             |             |             |             |             |             |             |
| hsa-miR-574-5p                  | 6.297795771 | 5.526770294 | 4.493464052 | 7.07675558  | 6.376195537 | 4.350190321 | 5.03054258  | 7.800312012 | 4.703668862 | 3.267973856 | 5.353319058 | 3.901170351 |
| hsa-miR-4532                    | 7.647323437 | 5.872193437 | 6.535947712 | 5.988023952 | 11.15834219 | 10.33170201 | 11.49838304 | 14.04056162 | 5.017246786 | 8.169934641 | 4.282655246 | 3.901170351 |
| hsa-let-7c-5p                   | 4.048582996 | 4.835924007 | 3.676470588 | 3.810560697 | 5.844845909 | 4.893964111 | 3.95256917  | 3.640145606 |             |             |             |             |
| hsa-miR-374b-5p                 | 5.847953216 | 6.21761658  | 4.901960784 | 4.354926511 | 4.250797024 | 8.156606852 | 5.03054258  | 8.840353614 | 7.212292255 | 3.267973856 | 3.211991435 | 3.901170351 |

|                 |             |             |             |             |             |             |             |             |             |             |             |             |
|-----------------|-------------|-------------|-------------|-------------|-------------|-------------|-------------|-------------|-------------|-------------|-------------|-------------|
| hsa-miR-1260a   | 24.29149798 | 8.635578584 | 6.944444444 | 6.532389766 | 4.782146652 | 4.893964111 | 9.360374415 | 6.345495059 |             |             |             |             |
| hsa-miR-421     |             |             |             |             | 5.844845909 | 5.981511691 | 5.03054258  | 3.120124805 | 4.076513013 | 5.718954248 | 3.901170351 | 4.565545871 |
| hsa-miR-590-5p  | 6.747638327 | 7.599309154 | 5.718954248 | 4.899292324 | 3.719447396 | 5.981511691 | 3.23392023  | 7.280291212 | 5.407966831 | 6.535947712 | 5.353319058 | 4.334633723 |
| hsa-miR-96-5p   | 4.948268106 | 5.526770294 | 4.493464052 | 5.443658138 | 5.714371035 | 4.350190321 | 3.95256917  | 8.840353614 |             |             |             |             |
| hsa-miR-4286    | 3.598740441 | 4.835924007 | 3.266194883 | 3.900286444 | 4.250797024 | 3.806416531 | 3.95256917  | 5.200208008 |             |             |             |             |
| hsa-miR-30b-5p  | 7.197480882 | 7.25388601  | 8.578431373 | 5.988023952 | 7.438894793 | 8.700380642 | 7.90513834  | 12.48049922 | 4.703668862 | 4.901960784 | 5.353319058 | 4.768097096 |
| hsa-miR-92a-3p  | 7.197480882 | 8.29015544  | 9.395424837 | 7.621121394 | 7.438894793 | 7.612833061 | 6.46784046  | 14.56058242 | 7.212292255 | 4.08496732  | 4.768097096 | 5.35511889  |
| hsa-miR-34a-5p  | 8.547008547 | 5.526770294 | 3.676470588 | 5.443658138 | 9.032943677 | 5.437737901 | 5.38986705  | 9.880395216 | 4.703668862 | 4.901960784 | 4.282655246 | 5.201560468 |
| hsa-miR-181a-3p | 4.086028162 | 4.498425551 | 4.493464052 | 3.266194883 | 4.709868881 | 6.376195537 | 3.5932447   | 4.160166407 |             |             |             |             |
| hsa-miR-185-5p  | 3.898394198 | 3.799654577 | 4.08496732  | 3.810560697 | 4.690164759 | 5.437737901 | 3.95256917  | 4.680187207 |             |             |             |             |
| hsa-miR-26a-5p  | 15.29464687 | 8.981001727 | 7.352941176 | 8.165487207 | 10.62699256 | 10.33170201 | 17.60689903 | 22.88091524 | 8.153026027 | 4.901960784 | 7.494646681 | 5.63502384  |
| hsa-miR-642a-5p | 6.297795771 | 5.526770294 | 4.493464052 | 4.354926511 | 6.16033923  | 4.250797024 | 5.38986705  | 8.840353614 | 6.898714331 | 6.535947712 | 6.423982869 | 5.63502384  |
| hsa-miR-132-3p  | 5.370589993 | 4.948268106 | 7.352941176 | 3.810560697 | 4.897168193 | 4.782146652 | 5.74919152  | 4.160166407 | 4.769256675 | 4.390090938 | 4.282655246 | 5.63502384  |
| hsa-miR-183-5p  | 8.097165992 | 8.635578584 | 11.4379085  | 8.709853021 | 5.313496281 | 5.981511691 | 7.90513834  | 13.00052002 | 4.703668862 | 6.535947712 | 9.635974304 | 6.068487213 |
| hsa-miR-324-5p  | 4.948268106 | 6.908462867 | 5.310457516 | 5.988023952 | 6.907545165 | 3.806416531 | 5.03054258  | 8.320332813 | 4.390090938 | 3.267973856 | 7.494646681 | 6.068487213 |
| hsa-miR-331-3p  | 6.09678374  | 7.944732297 | 4.901960784 | 5.443658138 | 4.782146652 | 7.612833061 | 5.74919152  | 6.760270411 |             |             |             |             |
| hsa-miR-340-5p  | 9.446693657 | 11.39896373 | 10.2124183  | 15.7866086  | 10.09564293 | 14.13811854 | 12.21703198 | 10.40041602 | 6.585136406 | 7.352941176 | 4.282655246 | 6.501950585 |

|                               |             |             |             |             |             |             |             |             |             |             |             |             |
|-------------------------------|-------------|-------------|-------------|-------------|-------------|-------------|-------------|-------------|-------------|-------------|-------------|-------------|
| hsa-let-7f-5p                 | 17.9937022  | 15.19861831 | 13.88888889 | 4.899292324 | 24.44208289 | 9.244154432 | 11.49838304 | 22.36089444 | 5.957980558 | 7.352941176 | 6.501950585 | 6.604290773 |
| hsa-miR-142-3p                | 8.547008547 | 8.29015544  | 6.535947712 | 10.34295046 | 7.438894793 | 7.612833061 | 7.1864894   | 14.04056162 | 5.644402634 | 8.986928105 | 4.282655246 | 6.935413958 |
| hsa-miR-361-5p                | 9.446693657 | 10.70811744 | 6.535947712 | 8.165487207 | 7.970244421 | 8.156606852 | 7.90513834  | 14.04056162 | 6.898714331 | 8.986928105 | 9.635974304 | 7.36887733  |
| hsa-miR-20a-5p+hsa-miR-20b-5p | 22.94197031 | 25.90673575 | 19.60784314 | 16.87534023 | 22.84803401 | 17.94453507 | 16.16960115 | 26.00104004 | 13.17027281 | 18.79084967 | 6.423982869 | 7.36887733  |
| hsa-miR-31-5p                 | 5.847953216 | 5.872193437 | 3.267973856 | 9.798584649 | 9.564293305 | 8.156606852 | 6.82716493  | 9.360374415 | 5.33082471  | 3.267973856 | 3.211991435 | 7.36887733  |
| hsa-miR-26b-5p                | 5.847953216 | 7.599309154 | 7.352941176 | 7.621121394 | 8.501594049 | 5.437737901 | 5.38986705  | 10.40041602 |             |             |             |             |
| hsa-miR-423-5p                | 8.547008547 | 10.3626943  | 7.761437908 | 9.798584649 | 12.75239107 | 10.8754758  | 13.29500539 | 10.92043682 | 6.585136406 | 6.535947712 | 7.36887733  | 6.82998715  |
| hsa-miR-196a-5p               | 11.69590643 | 12.08981002 | 7.761437908 | 8.709853021 | 11.15834219 | 13.05057096 | 13.29500539 | 9.880395216 | 10.03449357 | 13.07189542 | 7.494646681 | 9.102730819 |
| hsa-miR-196b-5p               | 12.14574899 | 13.47150259 | 8.578431373 | 4.354926511 | 9.564293305 | 3.806416531 | 12.21703198 | 13.52054082 | 9.407337723 | 13.07189542 | 5.353319058 | 9.102730819 |
| hsa-miR-126-3p                | 11.24606388 | 13.47150259 | 16.33986928 | 13.06477953 | 15.94048884 | 17.94453507 | 13.29500539 | 23.92095684 | 12.54311696 | 15.52287582 | 11.77730193 | 9.536194192 |
| hsa-miR-301a-3p               | 17.09401709 | 17.61658031 | 17.56535948 | 15.24224279 | 20.72263549 | 14.68189233 | 17.60689903 | 24.96099844 | 12.85669489 | 18.79084967 | 8.565310493 | 9.536194192 |
| hsa-miR-151a-3p               | 11.24606388 | 11.74438687 | 9.803921569 | 12.52041372 | 14.87778959 | 19.57585644 | 7.54581387  | 19.76079043 | 9.093759799 | 10.62091503 | 7.494646681 | 9.536194192 |
| hsa-miR-16-5p                 | 21.14260009 | 27.97927461 | 15.93137255 | 18.50843767 | 19.12858661 | 10.33170201 | 12.93568092 | 25.48101924 | 14.73816243 | 6.535947712 | 6.423982869 | 9.969657564 |
| hsa-miR-148b-3p               | 17.54385965 | 12.08981002 | 15.11437908 | 11.43168209 | 12.22104145 | 11.96302338 | 15.81027668 | 20.80083203 | 12.85669489 | 13.88888889 | 12.84796574 | 10.83658431 |
| hsa-miR-148a-3p               | 16.64417454 | 17.96200345 | 15.11437908 | 10.34295046 | 19.12858661 | 18.48830886 | 17.60689903 | 26.52106084 | 13.48385074 | 17.97385621 | 11.77730193 | 10.83658431 |

|                 |                 |                 |                 |                 |                 |                 |                 |                 |                 |                 |                 |                 |
|-----------------|-----------------|-----------------|-----------------|-----------------|-----------------|-----------------|-----------------|-----------------|-----------------|-----------------|-----------------|-----------------|
| hsa-miR-18a-5p  | 16.19433<br>198 | 23.83419<br>689 | 17.97385<br>621 | 21.23026<br>674 | 17.53453<br>773 | 14.13811<br>854 | 17.24757<br>456 | 21.84087<br>363 | 15.67889<br>621 | 20.42483<br>66  | 10.70663<br>812 | 10.83658<br>431 |
| hsa-miR-28-5p   | 17.54385<br>965 | 14.85319<br>516 | 13.48039<br>216 | 14.15351<br>116 | 17.53453<br>773 | 13.05057<br>096 | 16.88825<br>009 | 13.52054<br>082 | 13.48385<br>074 | 10.62091<br>503 | 12.84796<br>574 | 11.27004<br>768 |
| hsa-miR-24-3p   | 10.34637<br>877 | 15.88946<br>459 | 11.43790<br>85  | 10.88731<br>628 | 19.12858<br>661 | 14.13811<br>854 | 12.93568<br>092 | 17.16068<br>643 | 10.97522<br>734 | 9.803921<br>569 | 11.77730<br>193 | 11.27004<br>768 |
| hsa-miR-19b-3p  | 15.74448<br>943 | 21.07081<br>174 | 11.43790<br>85  | 16.33097<br>441 | 11.68969<br>182 | 13.59434<br>475 | 10.77973<br>41  | 25.48101<br>924 | 12.22953<br>904 | 8.986928<br>105 | 11.77730<br>193 | 11.27004<br>768 |
| hsa-miR-107     | 20.24291<br>498 | 19.34369<br>603 | 16.74836<br>601 | 15.78660<br>86  | 21.78533<br>475 | 17.40076<br>128 | 11.13905<br>857 | 29.64118<br>565 | 13.79742<br>866 | 14.70588<br>235 | 6.423982<br>869 | 11.27004<br>768 |
| hsa-miR-200a-3p | 18.44354<br>476 | 17.61658<br>031 | 14.29738<br>562 | 19.59716<br>93  | 22.84803<br>401 | 22.29472<br>539 | 22.63744<br>161 | 28.60114<br>405 | 19.12825<br>337 | 15.52287<br>582 | 10.70663<br>812 | 11.70351<br>105 |
| hsa-miR-106b-5p | 19.79307<br>242 | 25.90673<br>575 | 10.62091<br>503 | 16.33097<br>441 | 19.65993<br>624 | 24.46982<br>055 | 17.60689<br>903 | 21.32085<br>283 | 15.36531<br>828 | 13.88888<br>889 | 9.635974<br>304 | 12.13697<br>443 |
| hsa-miR-141-3p  | 26.99055<br>331 | 32.46977<br>547 | 26.55228<br>758 | 27.76265<br>651 | 28.16153<br>029 | 28.82001<br>088 | 28.74595<br>76  | 40.04160<br>166 | 19.12825<br>337 | 24.50980<br>392 | 13.91862<br>955 | 13.43736<br>454 |
| hsa-miR-222-3p  | 20.24291<br>498 | 17.61658<br>031 | 17.97385<br>621 | 10.88731<br>628 | 22.84803<br>401 | 18.48830<br>886 | 15.45095<br>221 | 19.76079<br>043 | 14.11100<br>659 | 11.43790<br>85  | 16.05995<br>717 | 13.87082<br>792 |
| hsa-let-7e-5p   | 16.19433<br>198 | 20.37996<br>546 | 15.93137<br>255 | 21.77463<br>255 | 28.16153<br>029 | 22.29472<br>539 | 23.35609<br>055 | 27.04108<br>164 | 8.780181<br>875 | 16.33986<br>928 | 9.635974<br>304 | 13.87082<br>792 |
| hsa-miR-98-5p   | 22.49212<br>776 | 21.41623<br>489 | 20.83333<br>333 | 28.30702<br>232 | 30.28692<br>88  | 26.10114<br>192 | 28.38663<br>313 | 35.36141<br>446 | 18.18751<br>96  | 28.59477<br>124 | 17.13062<br>099 | 14.73775<br>466 |
| hsa-miR-1180-3p | 14.84480<br>432 | 18.99827<br>288 | 12.66339<br>869 | 17.41970<br>604 | 18.06588<br>735 | 16.31321<br>37  | 16.16960<br>115 | 18.72074<br>883 | 14.11100<br>659 | 13.88888<br>889 | 13.91862<br>955 | 14.73775<br>466 |
| hsa-miR-130a-3p | 19.79307<br>242 | 23.83419<br>689 | 22.05882<br>353 | 13.06477<br>953 | 15.94048<br>884 | 23.92604<br>676 | 22.99676<br>608 | 28.60114<br>405 | 13.17027<br>281 | 17.97385<br>621 | 6.423982<br>869 | 15.17121<br>803 |
| hsa-miR-99b-5p  | 37.33693<br>207 | 34.19689<br>119 | 28.18627<br>451 | 31.02885<br>139 | 30.81827<br>843 | 26.64491<br>572 | 26.23068<br>631 | 39.00156<br>006 | 16.93320<br>79  | 25.32679<br>739 | 19.27194<br>861 | 16.03814<br>478 |
| hsa-miR-181a-5p | 35.08771<br>93  | 27.28842<br>832 | 18.79084<br>967 | 33.75068<br>046 | 41.44527<br>099 | 26.64491<br>572 | 37.72906<br>935 | 45.76183<br>047 | 20.38256<br>507 | 23.69281<br>046 | 23.55460<br>385 | 17.77199<br>827 |
| hsa-miR-23b-3p  | 34.63787<br>674 | 33.50604<br>491 | 23.69281<br>046 | 27.21829<br>069 | 36.13177<br>471 | 23.92604<br>676 | 24.79338<br>843 | 36.92147<br>686 | 23.51834<br>431 | 26.14379<br>085 | 31.04925<br>054 | 19.07238<br>838 |

|                               |             |             |             |             |             |             |             |             |             |             |             |             |
|-------------------------------|-------------|-------------|-------------|-------------|-------------|-------------|-------------|-------------|-------------|-------------|-------------|-------------|
| hsa-miR-27b-3p                | 30.13945119 | 33.85146805 | 25.73529412 | 26.12955906 | 29.22422954 | 25.01359434 | 24.07473949 | 24.96099844 | 20.06898714 | 18.79084967 | 7.494646681 | 19.50585176 |
| hsa-miR-19a-3p                | 20.24291498 | 46.63212435 | 29.41176471 | 31.02885139 | 27.63018066 | 33.1702012  | 21.20014373 | 39.52158086 | 22.89118846 | 30.22875817 | 20.34261242 | 19.93931513 |
| hsa-miR-15a-5p                | 23.84165542 | 32.12435233 | 20.4248366  | 25.58519325 | 29.75557917 | 25.55736813 | 24.07473949 | 26.52106084 | 18.50109752 | 28.59477124 | 20.34261242 | 24.27394885 |
| hsa-miR-221-3p                | 62.97795771 | 57.68566494 | 38.80718954 | 52.80348394 | 38.78852285 | 36.43284394 | 29.10528207 | 56.68226729 | 32.92568203 | 41.66666667 | 32.11991435 | 25.1408756  |
| hsa-let-7i-5p                 | 58.92937472 | 51.46804836 | 42.48366013 | 47.3598258  | 52.07226355 | 53.83360522 | 47.79015451 | 67.08268331 | 26.34054563 | 30.22875817 | 22.48394004 | 25.57433897 |
| hsa-miR-29a-3p                | 57.1300045  | 69.43005181 | 49.83660131 | 54.9809472  | 46.75876727 | 47.30831974 | 41.68163852 | 68.12272491 | 26.65412355 | 43.30065359 | 21.41327623 | 25.57433897 |
| hsa-miR-9-5p                  | 32.83850652 | 39.0328152  | 32.67973856 | 29.39575395 | 31.88097768 | 33.1702012  | 29.82393101 | 40.04160166 | 29.78990279 | 37.58169935 | 22.48394004 | 26.00780234 |
| hsa-miR-125a-5p               | 46.33378318 | 50.08635579 | 43.30065359 | 48.44855743 | 49.41551541 | 46.76454595 | 53.53934603 | 73.84295372 | 38.25650674 | 40.8496732  | 17.13062099 | 27.74165583 |
| hsa-miR-106a-5p+hsa-miR-17-5p | 71.07512371 | 71.84801382 | 56.78104575 | 62.60206859 | 66.95005313 | 62.53398586 | 61.0851599  | 80.60322413 | 49.85888993 | 50.65359477 | 34.26124197 | 28.1751192  |
| hsa-miR-32-5p                 | 38.68645974 | 31.0880829  | 35.94771242 | 44.09363092 | 36.13177471 | 38.06416531 | 25.51203737 | 36.40145606 | 29.47632487 | 46.56862745 | 23.55460385 | 29.47550932 |
| hsa-let-7g-5p                 | 82.77103014 | 77.02936097 | 74.34640523 | 64.77953185 | 83.4218916  | 72.32191408 | 103.1261229 | 120.6448258 | 49.23173409 | 32.67973856 | 24.62526767 | 32.50975293 |
| hsa-miR-200b-3p               | 42.28520018 | 48.01381693 | 42.89215686 | 24.49646162 | 45.69606801 | 28.27623709 | 45.27488322 | 48.88195528 | 35.74788335 | 32.67973856 | 28.90792291 | 32.9432163  |
| hsa-miR-7-5p                  | 53.0814215  | 41.4507772  | 44.52614379 | 41.91616766 | 61.63655685 | 45.67699837 | 59.28853755 | 70.72282891 | 40.13797429 | 39.21568627 | 46.0385439  | 37.27785002 |
| hsa-miR-135b-5p               | 54.43094917 | 49.74093264 | 50.24509804 | 56.61404464 | 61.63655685 | 57.09624796 | 52.82069709 | 65.0026001  | 43.27375353 | 53.10457516 | 31.04925054 | 40.31209363 |
| hsa-let-7d-5p                 | 90.86819613 | 84.62867012 | 80.47385621 | 93.08655416 | 104.6758767 | 67.97172376 | 74.73948976 | 103.4841394 | 53.3082471  | 72.7124183  | 48.17987152 | 44.21326398 |
| hsa-miR-15b-5p                | 69.27575349 | 86.70120898 | 69.85294118 | 82.19923789 | 78.63974495 | 64.16530723 | 56.05461732 | 78.52314093 | 47.97742239 | 59.64052288 | 35.33190578 | 44.21326398 |



|                           |                 |                 |                 |                 |                 |                 |                 |                 |                 |                 |                 |                 |
|---------------------------|-----------------|-----------------|-----------------|-----------------|-----------------|-----------------|-----------------|-----------------|-----------------|-----------------|-----------------|-----------------|
| hsa-miR-25-3p             | 94.46693<br>657 | 103.6269<br>43  | 84.96732<br>026 | 76.21121<br>394 | 104.6758<br>767 | 101.6856<br>987 | 92.70571<br>326 | 113.8845<br>554 | 67.41925<br>368 | 88.23529<br>412 | 48.17987<br>152 | 67.18682<br>271 |
| hsa-miR-374a-5p           | 89.06882<br>591 | 98.10017<br>271 | 77.20588<br>235 | 86.00979<br>858 | 115.3028<br>693 | 119.6302<br>338 | 97.73625<br>584 | 109.2043<br>682 | 83.72530<br>574 | 99.67320<br>261 | 64.23982<br>869 | 80.19072<br>388 |
| hsa-miR-125b-5p           | 173.1893<br>837 | 197.5820<br>38  | 148.6928<br>105 | 174.7414<br>262 | 177.4707<br>758 | 136.4872<br>213 | 120.7330<br>219 | 197.0878<br>835 | 108.8115<br>397 | 142.9738<br>562 | 111.3490<br>364 | 94.49501<br>517 |
| hsa-miR-200c-3p           | 129.5546<br>559 | 143.6960<br>276 | 122.5490<br>196 | 127.3816<br>004 | 151.4346<br>44  | 136.4872<br>213 | 112.4685<br>591 | 139.8855<br>954 | 107.8708<br>059 | 107.0261<br>438 | 92.07708<br>779 | 94.49501<br>517 |
| hsa-miR-23a-3p            | 123.2568<br>601 | 108.1174<br>439 | 110.7026<br>144 | 100.7076<br>756 | 143.9957<br>492 | 110.3860<br>794 | 151.2756<br>019 | 178.3671<br>347 | 99.40420<br>194 | 144.6078<br>431 | 110.2783<br>726 | 97.52925<br>878 |
| hsa-let-7b-5p             | 139.9010<br>346 | 141.6234<br>888 | 122.9575<br>163 | 127.3816<br>004 | 173.7513<br>284 | 166.3947<br>798 | 163.4926<br>338 | 222.5689<br>028 | 111.3201<br>631 | 137.2549<br>02  | 96.35974<br>304 | 98.82964<br>889 |
| hsa-miR-93-5p             | 127.3054<br>431 | 150.9499<br>136 | 114.7875<br>817 | 143.7125<br>749 | 153.5600<br>425 | 135.3996<br>737 | 116.0618<br>038 | 175.2470<br>099 | 106.3029<br>163 | 131.5359<br>477 | 73.87580<br>3   | 100.5635<br>024 |
| hsa-miR-191-5p            | 116.5092<br>218 | 133.6787<br>565 | 116.4215<br>686 | 117.5830<br>158 | 153.0286<br>929 | 151.1691<br>136 | 140.1365<br>433 | 177.8471<br>139 | 114.1423<br>644 | 141.3398<br>693 | 119.9143<br>469 | 123.9705<br>245 |
| hsa-miR-21-5p             | 309.0418<br>354 | 291.1917<br>098 | 279.0032<br>68  | 269.4610<br>778 | 370.3506<br>908 | 278.9559<br>543 | 329.5005<br>39  | 428.4971<br>399 | 172.4678<br>583 | 219.7712<br>418 | 115.6316<br>916 | 133.5067<br>187 |
| hsa-miR-100-5p            | 219.0733<br>243 | 243.8687<br>392 | 212.0098<br>039 | 187.2618<br>4   | 256.1105<br>207 | 217.5095<br>16  | 227.0930<br>65  | 303.6921<br>477 | 190.6553<br>779 | 236.1111<br>111 | 164.8822<br>27  | 166.8833<br>984 |
| hsa-miR-4454+hsa-miR-7975 | 1262.708<br>052 | 342.6597<br>582 | 336.6013<br>072 | 344.5835<br>602 | 359.1923<br>486 | 384.4480<br>696 | 359.6837<br>945 | 456.5782<br>631 | 244.5907<br>808 | 245.9150<br>327 | 217.3447<br>537 | 186.3892<br>501 |
| hsa-let-7a-5p             | 808.3670<br>715 | 812.0898<br>1   | 736.1111<br>111 | 688.6227<br>545 | 977.1519<br>66  | 963.0233<br>823 | 948.6166<br>008 | 1136.245<br>45  | 546.5663<br>217 | 714.0522<br>876 | 431.4775<br>161 | 465.1061<br>985 |
| hsa-miR-29b-3p            | 805.6680<br>162 | 890.5008<br>636 | 747.9575<br>163 | 749.0473<br>598 | 1026.567<br>481 | 930.9407<br>287 | 911.9655<br>049 | 1073.842<br>954 | 693.9479<br>461 | 776.9607<br>843 | 474.3040<br>685 | 578.2401<br>387 |
